# Supplementary material for: Rapid clearance of Schistosoma mansoni circulating cathodic antigen after treatment shown by urine strip tests in a Ugandan fishing community – Relevance for monitoring treatment efficacy and re-infection
Source: PLoS Negl Trop Dis. 2017 Nov 13;11(11):e0006054. doi: 10.1371/journal.pntd.0006054 (PMC5703575; doi:10.1371/journal.pntd.0006054)
Supplement: S1 Dataset — (XLSX) [file pntd.0006054.s004.xlsx]

## Sheet: Data
Anonymised ID	Sex	Age	Age groupings	Tx	CCA A	CCA B	CCA C	CCA D	CCA E	CCA G	Sm A1.1	Sm A1.2	Sm A2.1	Sm A2.2	Sm A3.1	Sm A3.2	Sm E1.1	Sm E1.2	Sm E2.1	Sm E2.2	Sm E3.1	Sm E3.2	Sm G1.1	Sm G1.2	Sm G2.1	Sm G2.2	Sm G3.1	Sm G3.2	Hkw A	Hkw E	Hkw G	Al A	Al E	Al G
1	1	49	6	0	2	1	0	1	0.5	1	160	220	220	160	140	140	70	0	0	40	80	140	20	40	40	60	0	60	1	0	0	0	0	0
2	1	23	4	0	3	2	0	0	-1	1	1240	1400	3780	2920									0	0	0	0	0	0	1		0	0		0
3	1	12	2	0	3	0	1	1	1	0	300	380	0	60	340	300	0	0	0	0	0	0	0	0	0	0	0	0	1	0	0	0	0	0
4	0	13	2	1	3	0	1	0.5	0.5	1	220	220	520	220	300	300	23	0	0	20	40	40	40	20	40	20	40	20	0	0	0	0	0	0
5	1	27	4	0	3	-1	-1	-1	-1	1	1220	1240	2400	2120	2520	2080	0	0	0	0	0	0	0	0	240	80	0	0	1	1	1	0	0	0
6	0	13	2	1	1	-1	0.5	0	0	2	200	280	180	100	100	240	0	0	0	0	0	0	200	80	20	60	40	0	0	0	1	0	0	0
7	1	9	1	0	3	1	2	2	1	1	640	760	1160	1080	1760	2540	390	220	300	540	720	260	40	0	120	20	40	0	0	0	0	0	0	0
8	0	7	1	0	3	0	0	0	0	2	40	40	80	100	0	0	0	0	0	0	0	0	0	0	40	20	40	20	0	0	0	0	0	0
9	1	26	4	0	3	0	0	-1	2	3	320	340	620	320	380	400	5	0	20			0	400	260	160	180	560	760	0	0	0	0	0	0
10	0	29	4	1	0	0	0	0	0	0	0	0	0	0	0	0	0	0	0			0	0	0	0	0	0	0	1	0	0	0	0	0
11	1	8	1	0	3	0	1	1	2	1	60	60	340	460	240	340	47	80	160	20	0	20	40	0	20	20	80	40	0	0	0	0	0	0
12	0	38	5	1	0	0	0	-1	0.5	1	0	40	20	0	0	20	0					0							1			0	0
13	1	10	2	0	2	0	0	0	0	1	320	300	300	220	40	140	5	0	20	0	0		0	0	0	0	0	20	0	0	0	0	0	0
14	1	25	4	1	1	0	0	0	0	-1	200	300	380	360	80	200	0	0	0	0	0	0							1	0		0	0
15	1	23	4	0	0	1	0	0	0	-1	200	300	380	360	80	200	0	0	0	0	0	0							1	0		0	0
16	1	13	2	0	2	1	0.5	1	0.5	3	160	260	120	60	100	40	0	0	0	0	0	0	600	800	760	1400	760	800	0	0	1	0	0	0
17	0	29	4	0	0	0	1	0	0	1	0	0	0	0	0	0	0	0	0	0	0	0	0	0	0	0	0	0	0	0	0	0	0	0
18	0	12	2	1	3	0	0	0	1	1	1240	1380	980	1280	100	160	0	0	0	0	0		20	40					0	0	0	0	0
19	1	27	4	1	2	-1	0	0	0.5	0	1660	1880	660	420	180	240	0	0	0			0	0	0	0	0	0	0	1	0	1	0	0	0
20	1	8	1	0	1	0	1	1	0	-1	40	100	420	420	260	180	0	0	0	0	0								0	0		0	0
21	0	24	4	0	0.5	0	0	-1	0	0	0	0	40	20	0	20	0	0	0	0	0	0	0	0	0	0	0	0	1	0	1	0	0	0
22	1	8	1	1	3	0	0	0	0	1	0	40	0	20	60	40	0	0	0	0	0	0	20	0	0	0	0	0	0	0	0	0	0	0
23	1	32	5	1	3	1	1	1	-1	3	3340	2340	460	980	140	100	0	0	0	0	0	0	20	0	0	80	0	20	0	0	0	0	0	0
24	1	8	1	0	2	0	1	1	2	3	260	260	700	660	240	280	53	40	60	20	0	80	180	80	400	420	860	840	0	0	1	0	0	0
25	1	53	6	1	2	-1	0.5	0	1	0.5	80	60	80	80	360	280	0	0	0	0	0	0	20	0	0	0	0	0	0	0	0	0	0	0
26	1	35	5	0	2	0.5	0	-1	0	1	0	0	0	0	0	0	0	0	0			0	20	0	0	0	40	0	0	0	0	0	0	0
27	1	11	2	0	3	1	2	2	2	3	4200	4540	5220	3800	2920	2340	40	20	20			40	100	200	80	220	100	160	1	0	0	0	0	0
28	1	12	2	1	3	-1	2	1	2	3	2380	1200	2700	2960	1360	720	103	200	180	120	120	0	640	320	100	80	100	140	0	0	0	0	0	0
29	1	9	1	1	2	-1	0	0	0	3	260	380	180	280	300	220	3	0	20	0	0	0	360	340	580	280	20	80	0	0	0	0	0	0
30	1	29	4	1	2	0	0	0	0	1	220	200	280	360	0	0	0	0	0	0	0	0	0	0	0	0	0	0	0	0	1	0	0	0
31	0	29	4	0	1	-1	0	-1	0	-1	120	160	280	240	880	580	0	0	0	0	0	0							0	0		0	0
32	0	12	2	0	2	1	0	-1	1	-1	280	240	280	200	0	40	10	0	0	0	0	20							0	0		0	0
33	1	75	7	0	3	1	-1	-1	2	0	20	0	160	200	20	60	0	0	0	0	0	0	0	0	0	0	0	0	1	0	1	0	0	0
34	0	10	2	1	3	1	0.5	0.5	0.5	1	160	160	420	200	740	660	0	0	0	0	0	0	0	0	0	0	0	0	0	0	0	0	0	0
35	0	8	1	0	1	0	0	0	1	-1	0	20	0	0	0	60	37	60	40	60	60	0							0	0		0	0
36	1	28	4	0	3	1	1	-1	1	1	140	200	40	60	100	100	0	0	0	0	0	0	0	0	0	0	0	0	1	0	1	0	0	0
37	0	20	4	0	1	0.5	0.5	0	0	1	100	240	200	400	320	420	0	0	0	0	0	0	0	0	0	0	0	0	0	0	1	0	0	0
38	0	14	2	0	1	0.5	0	0	0	-1	280	260	520	440	100	20	0	0	0	0	0	0	0	0	0	0	0	0	1	0	0	0	0	0
39	0	36	5	0	2	0.5	0	0	0	-1	20	20	100	20	40	20	0	0	0	0	0	0							1	1		0	0
40	0	14	2	1	3	2	2	1	0	3	740	280	320	280	200	140	7	0	0	0	0	0	80	0	0	0	160	140	0	1	1	0	0	0
41	0	12	2	0	3	3	2	0	1	3	480	440	0	0	160	100	13	0	0	0	0	60	160	180	0	0	120	120	0	0	1	0	0	0
42	0	10	2	0	3	1	3	3	2	-1	2080	1380	100	180	40	40	40	140	80	0	0	20	140	0	60	40	220	260	0	0	1	0	0	0
43	0	15	3	1	2	1	2	2	0	3	1060	760	1200	1100	1260	1600	63	160	60	40	40	60	460	300	340	200	420	360	0	0	1	0	0	0
44	0	20	4	0	0.5	0	-1	-1	0	0.5	20	0	20	60	0	0	0	0	0	0	0	0	0	0	0	0	0	0	1	0	0	0	0	0
45	1	18	3	1	3	2	1	0	1	-1	2580	2020	2700	2960	740	1380	0	0	0	0	0	0							0	0		0	0
46	1	39	5	0	-1	-1	-1	-1	1	0	0	0	0	0	0	0	0	0	0	0	0	0	20	0	40	0	0	0	1	0	1	0	0	0
47	1	30	5	0	0	0	-1	-1	0	0	0	0	0	0	0	0	0	0	0	0	0	0	0	0	0	0	0	0	1	0	0	0	0	0
48	0	17	3	1	3	1	1	1	1	1	780	1000	1340	1000			27	20	20	40	40	20	20	40	60	40	140	140	0	0	1	0	0	0
49	1	11	2	0	2	1	0	2	1	-1	540	500	180	300	140	160	70	60	20	200	120	20	340	420					0	0	0	0	0
50	0	18	3	0	2	-1	2	-1	2	-1	0	0	260	160	120	120	10	0	0	40	0	0							1	0		0	0
51	1	7	1	1	3	2	2	2	-1	3	760	860	640	620	1540	1660	103	0	20	60	20	340	440	840	2200	1940	1520	1700	0	0	0	0	0	0
52	1	9	1	0	3	2	2	2	2	-1	600	1060	820	840	0	0	103	0	40	100	300	140	1480	1520					0	0	0	0	0
53	1	22	4	0	1	-1	1	1	1	3	140	240	100	140	140	100	23	0	20	0	20	80	260	200	220	240	180	220	0	0	0	0	0	0
54	0	19	3	1	1	-1	1	-1	0	0.5	240	280	480	660	320	380	0	0	0	0	0	0	20	0	0	0	0	0	0	0	1	0	0	0
55	1	38	5	0	0	0	0	0	0.5	0	20	60	0	0	0	0	0	0	0	0	0	0	0	0	0	0	0	0	1	0	0	0	0	0
56	1	8	1	1	0	-1	0	0	0	0	380	320	80	120	60	80	0	0	0	0	0		0	0	0	20	0	0	0	0	0	0	0	0
57	1	34	5	0	3	2	2	1	1	-1	60	20	180	100	160	120	5			0	20	0	980	860	560	460	1540	1180	0	0	0	0	0	0
58	1	36	5	0	0	0	0	0	0	-1	0	0	0	0	5440	5420	0	0	0	0	0	0	0	0	0	0	0	0	0	0	0	0	0	0
59	1	8	1	1	2	2	2	-1	1	2	900	1280	0	0	1660	960	0	0	0	0	0	0	360	160	500	540	360	360	0	0	0	0	0	0
60	1	35	5	1	3	2	0	0.5	0	1	3680	3180	1100	640	2640	2280	0	0	0	0	0	0	0	0	0	0	0	0	0	0	0	0	0	0
61	1	7	1	1	3	2	2	2	0.5	-1	1040	1180	720	1280	2060	1640	10	0	60	0	0	0							0	0		0	0
62	1	65	7	1	3	0.5	1	1	0.5	-1	40	0	0	60	100	60	3	0	0	0	0	0	0	0	0	0	0	0	1	0	0	0	0	0
63	0	67	7	0	3	0	2	-1	1	1	0	0	20	40	20	0	0	0	0			0	0	0	0	0	0	0	0	0	0	0	0	0
64	1	9	1	0	3	2	3	3	3	-1	1400	1440	600	860	1280	760	40	60	20	60	20	20	120	100	160	220	200	180	0	0	0	0	0	0
65	1	71	7	1	0.5	0	0	0	0	0	0	20	80	60	40	60	0	0	0	0	0	0	0	0	0	0	0	0	1	0	0	0	0	0
66	0	56	6	1	2	0	0.5	0	0	0	140	60	220	160	560	500	0	0	0	0	0		0	0	0	0	0	0	1	0	1	0	0	0
67	0	18	3	1	2	0	1	-1	0	1	160	120	120	100	40	60	0	0	0	0	0	0	0	60	40	0	20	40	0	0	0	0	0	0
68	0	11	2	0	3	1	2	1	0	1	1200	1080	1780	1580	3680	5040	83	120	60	60	100	140	240	100	420	340	200	100	0	0	0	0	0	0
69	0	9	1	0	3	2	1	1	2	2	1220	860	1900	2020	1880	1400	20	0	20	40	20	20	60	0	160	80	80	100	0	0	0	0	0	0
70	0	10	2	0	2	2	2	2	2	-1	280	620	900	640	340	440	73	100	100	20	40	120							0	0		0	0
71	1	16	3	0	1	0	-1	-1	1	-1	40	0	40	20	100	0	3	0	0	0	0	20							1	0		0	0
72	1	28	4	0	3	2	-1	-1	-1	-1	580	560	740	640	280	320													1			0
73	1	60	7	1	1	0	0	0	0	-1	0	0	0	0	0	20	3	0	0	0	0	20							1	1		0	0
74	0	48	6	1	1	0	1	0	0	-1	0	0	0	0	0	0	0	0	0	0	0	0							1	0		0	0
75	1	11	2	1	2	0	0	-1	0.5	1	2760	2360	2060	2160	1000	2300	3	0	0	0	0	20	0	0	0	0	0	0	0	0	1	0	0	0
76	0	18	3	0	3	2	-1	-1	-1	-1	1620	1240	1160	1300	540	360	0			0	0								1	0		0	0
77	1	29	4	0	3	2	1	-1	1	1	340	420	720	660	320	340	0	0	0	0	0	0	0	0	0	0	0	0	1	0	0	0	0	0
78	1	7	1	0	3	0	1	0	1	1	140	60	0	0	80	180	0	0	0	0	0	0	60	60	240	400	120	140	1	0	1	0	0	0
79	0	12	2	1	3	1	1	0.5	0	3	360	320	40	80	560	200	3	0	0	0	0	0	460	640	1140	860	340	360	0	0	1	0	0	0
80	0	65	7	0	0	0	0	0	0	-1	40	20	0	0	0	0	0	0	0			0	0	0	0	0	0	0	1	0	1	0	0	0
81	1	45	6	0	3	1	-1	-1	0	0	440	360	220	260	220	140	0			0	0		0	0	0	0	0	0	0	0	0	0	0	0
82	1	21	4	0	3	-1	0	-1	0	2	2540	2800	460	660	780	480	3	20	0	0	0	0	280	260	460	620	420	520	0	0	0	0	0	0
83	1	17	3	1	3	-1	0.5	0	2	1	580	680	80	200	700	620	7	0	0	20	0	20	40	100	80	0	80	40	1	0	1	0	0	0
84	1	9	1	1	2	-1	0.5	-1	2	2	1000	1160	980	980	1280	1540	40	0	0			120	320	300	280	360	260	220	1	0	0	0	0	0
85	0	50	6	0	0.5	0	0	0	1	-1	20	40	80	80	60	40	0	0	0	0	0	0							1	0		0	0
86	1	30	5	0	3	2	-1	-1	0.5	3	1800	1500	1680	960	2200	2240	0	0	0	0	0		0	0	0	0	0	0	1	0	0	0	0	0
87	0	8	1	0	0	-1	0	1	0	0	0	100	40	20	40	40	0	0	0	0	0	0	20	40	20	0	0	20	0	0	0	0	0	0
88	0	42	6	0	0	0	0	0	0	0	0	0	0	0	0	0	0	0	0	0	0	0	0	0	40	100	0	0	0	0	1		0	0
89	1	16	3	1	3	2	1	1	1	1	0	3580	2820	2540	2320	2280	0	0	0	0	0	0	0	0	0	0	0	0	1	0	0	0	0	0
90	1	19	3	0	3	2	1	-1	0.5	2	4940	2260	5540	6100	3040	3480	3	0	0	20	0	0	120	60	280	200	180	160	1	0	0	0	0	0
91	1	17	3	0	3	2	1	-1	2	-1	3740	3620	1060	760	2940	2320	30	0	0	20	40	40	600	780	580	620	640	600	1	0	0	0	0	0
92	0	34	5	0	1	0	-1	0	-1	0	0	0	20	0	0	0	0	0	0	0	0	0	0	40	0	20	40	20	1	0	1	0	0	0
93	1	16	3	0	3	2	1	1	1	1	440	400	480	300	520	660	3	0	0	0	0	20	0	0	20	0	0	0	1	1	0	0	0	0
94	0	10	2	0	1	1	1	-1	1	1	440	320	140	120	100	20	20	0	20	60	40	0	0	0	0	0	60	0	0	0	0	0	0	0
95	1	70	7	1	0	0.5	0	-1	-1	0	0	20	0	0	20	0	0	0	0	0	0	0	0	0	0	0	20	0	0	0	1	0	0	0
96	0	65	7	0	0	0	0	0	0	0	0	0	0	0	0	0	0	0	0	0	0	0	0	0	0	0	0	0	1	0	1	0	0	0
97	1	32	5	0	0	-1	0	1	1	-1	0	0	100	180	40	20	3	0	0	0	0	0	0	0	0	0	0	0		1	0	0	0	0
98	1	8	1	0	-1	-1	2	3	-1	-1	1540	880	800	820	2240	1700													1			0
99	0	47	6	0	1	0	0	0	0	1	0	0	0	0	0	0	0	0	0	0	0	0	0	0	0	0	0	0	1	0	1	0	0	0
100	1	18	3	0	3	2	-1	-1	-1	2	3620	2680	3280	2500	5600	4800							120	180	440	340	380	300	0		0	0		0
101	0	10	2	0	0	0	0	2	2	1	0	0	0	0	0	0	7	20	20	0	0	0	0	20	0	20	0	0	0	0	1	0	0	0
102	1	40	6	0	0.5	0	1	-1	0.5	2	220	120	80	40	80	100	13	0	20	0	0	20	300	200	260	280	220	260	0	0	0	0	0	0
103	0	30	5	1	0	0	0	0	0	-1	0	0	0	0	0	0	0	0	0	0	0	0							1	0		0	0
104	1	25	4	0	3	3	1	1	-1	1	6180	5740	3580	2700	2380	2600	0	0	0	0	0	0	240	300	420	340	380	400	0	0	0	0	0	0
105	1	44	6	1	0	0	0	0	0	-1	80	0	0	0	60	40	3	0	0	20	0	0							0	0		0	0
106	1	43	6	0	1	0.5	1	-1	1	0	0	40	40	80	0	0	0	0	0	0	0	0	20	0	0	0	0	20	0	0	0	0	0	0
107	0	11	2	0	0	0.5	0	-1	0	1	40	60	180	120	40	60	0	0	0	0	0	0	0	0	0	0	0	0	0	0	1	0	0	0
108	0	8	1	1	0.5	0	0	0	0	-1	0	60	60	80	40	80	0	0	0	0	0	0							0	0		0	0
109	0	23	4	1	2	0	0	0	0	-1	180	60	220	100	40	20	0	0	0	0	0	0							1	0		0	0
110	0	7	1	0	0	0	0	0	0	-1	20	0	20	0	100	80	13	0	60	20	0	0							0	0		0	0
111	1	55	6	1	1	1	0	-1	0	0.5	140	80	0	0	40	40	0	0	0	0	0		0	0	0	0	0	0	1	0	1	0	0	0
112	0	43	6	0	0	1	0	-1	0	0	840	740	20	0	20	0	0	0	0	0	0	0	0	0	0	0	0	0	1	0	1	0	0	0
113	1	20	4	1	3	0	2	0	1	2	360	240	300	240	1160	960	0	0	0	0	0	0	0	0	20	40	0	0	0	0	0	0	0	0
114	1	8	1	0	2	2	3	2	3	0.5	1620	1340	3100	2560	0	0	543	460	820	920	1060	0	100	140	0	0	40	80	1	0	1	0	0	0
115	1	7	1	1	0	0	0	0	0.5	1	20	20	0	0	0	20	0	0	0	0	0	0	60	0	0	0	0	40	0	0	0	0	0	0
116	1	42	6	0	2	1	0	-1	0.5	1	680	920			700	1020	0	0	0	0	0	0	40	20	20	20	0	40	1	0	0	0	0	0
117	0	30	5	0	0	0	0	0	0	0	0	0	0	0	0	20	0	0	0	0	0	0	0	0	0	0	0	0	1	0	0	0	0	0
118	0	11	2	1	1	1	0.5	0	0	-1	20	0	120	80	40	60	0	0	0	0	0	0							0	0		0	0
119	1	12	2	1	3	0.5	0.5	0.5	0	3	300	260	980	1020	1080	1000	0	0	0	0	0	0	120	60	80	240	100	20	0	0	0	0	0	0
120	1	42	6	1	3	0	2	0	2	0.5	180	140	1340	1000	80	100	0	0	0	0	0	0	0	0	0	20	0	0	1	0	1	0	0	0
121	0	28	4	1	1	0	0	0	1	0	0	0	240	320	0	60	0	0	0	0	0	0	0	0	0	0	0	0	1	0	1	0	0	0
122	1	30	4	0	2	-1	0.5	-1	-1	-1	180	200	360	280	440	780	0	0	0	0	0	0							0			0
123	0	25	4	1	0.5	-1	0.5	-1	1	1	20	0	0	60	20	0	0	0	0	0	0	0	20	0	0	0	0	0	0	0	0	0	0	0
124	0	13	2	0	3	2	0.5	0	1	-1	3520	3620	1100	720	1320	900	33	60	80	20	20	20							0	0		0	0
125	1	11	2	0	3	2	0	0	1	1	2760	2360	2060	2160	1000	2300	3	0	0	0	0	0	0	20	0	20	100	20	0	0	0	0	0	0
126	0	35	5	0	1	0	0.5	-1	0	0	0	0	0	40	60	60	0	0	0	0	0	0	0	0	0	0	0	0	1	0	1	0	0	0
127	1	11	2	1	2	1	1	1	2	3	140	120	100	40	380	240	20	0	20	0	20	60	100	100	0	20	0	0	1	0	1	0	0	0
128	0	24	4	0	0	0	0	-1	0	0	0	0		0	0	0	0	0	0	0	0	0	0	0	0	0	0	0	1	0	1	0	0	0
129	1	24	4	1	3	2	1	0	0	0	7940	6560	1500	1080	2040	1940	0	0	0	0	0	0	0	20	0	0	0	0	0	0	0	0	0	0
130	0	18	3	0	2	2	3	2	2	2	980	140	980	940	1960	1520	17	0	0	0	20	60	40	100	40	20	40	0	0	0	0	0	0	0
131	0	40	6	0	0	0	0	0	0	0.5	0	0	0	0	0	0	0	0	0	0	0	0	20	0	0	20	0	0	0	0	1	0	0	0
132	0	13	2	1	3	0	0	0	0	1	1180	700	80	300	880	920	13	0	20	0	0	40	0	0	20	20	0	0	0	0	1	0	0	0
133	1	34	5	1	2	0	0	0	0	-1	0	0	0	0	0	0	0	0	0	0	0	0	0	0	100	80	0	80	0	0	0	0	0	0
134	0	13	2	0	3	2	-1	-1	2	2	1020	1060	1000	700	2000	2040	97	80	60	140	220	20	60	0	160	260			0	0	1	0	0	0
135	1	11	2	0	3	3	-1	-1	1	2	1760	1780	0	0	4020	3200	3	0	0	0	0	20	540	720	460	280	740	500	0	0	0		0	0
136	1	37	5	0	3	2	2	2	2	3	620	300	1280	2040	420	920	7	0	0	0	40	0	0	0	20	40	220	280		0	1		0	0
137	0	27	4	1	0	0	0	0	0.5	0	620	20	60	60	80	20	0	0	0	0	0	0	0	0	0	0	0	0	0	0	1	0	0	0
138	0	56	6	0	0	1	0.5	0.5	0	1	0	0	0	0	0	0	0	0	0	0	0	0	0	0	0	0	0	0	0	0	1	0	0	0
139	1	38	5	0	3	2	0	0	0	1	260	260	800	1120	260	220	0	0	0	0	0	0	0	0	20	0	20	0	1	0	1	0	0	0
140	0	35	5	1	0	0	0	-1	0	0.5	0	0	0	0	0	0	0	0	0	0	0	0	20	0	0	0	20	0	1	0	1	0	0	0
141	1	11	2	1	2	1	0.5	0	0	2	440	300	160	180	420	240	0	0	0	0	0	0	80	80	0	0	0	0	0	0	0	0	0	0
142	0	24	4	1	0	0	0	0	0.5	0.5	0	0	0	0	20	60	0	0	0	0	0	0	0	20	0	0	20	20	1	0	1	0	0	0
143	1	75	7	1	1	0	0	0	0	3	80	120					0	0	0	0	0	0	900	1020	640	600	940	880	0	0	0	0	0	0
144	1	76	7	0	0	0	0	0	-1	0	0	0	0	0	20	0	0	0	0	0	0	0	0	0	0	0	0	0	1	1	1	0	0	0
145	0	23	4	0	3	2	1	0.5	1	2	660	580	1060	1380	1200	1040	13	0	0	20	0	60	40	60	40	60			1	1	1	0	0
146	0	7	1	0	0	0.5	0	0.5	0	2	60	60	240	100	160	60	10	40	20	0	0	0	0	0	20	20			1	0	1	0	0	0
147	0	26	4	1	3	2	0.5	1	2	-1	1800	860	480	440	3800	3660	7	20	0	0	20	0							1	0		0	0
148	1	7	1	1	3	1	3	2	2	-1	180	160	180	180	120	220	47	20	20	60	160	0							0	0		0	0
149	1	70	7	0	3	2	3	2	2	3	3240	2800	620	360	4120	3340	30	0	60	20	100	0	0	20	0	0	20	20	0	0	1	0	0	0
150	0	65	7	1	0.5	0	0	0	0	0	0	0	0	0	0	20	0	0	0	0	0	0	0	0	0	0	0	0	1	0	0	0	0	0
151	0	44	6	1	0	0	0	0	0	0	0	0	0	0	0	0	0	0	0			0	0	20	0	0	0	60	1	0	1	0	0	0
152	0	18	3	1	3	2	2	1	1	3	1460	1200	900	1040	620	540	0	0	0			0							0	0		0	0
153	0	11	2	1	3	3	2	-1	3	-1	480	580	1340	1080	560	480	23	0	100	20	0	0	120	80	100	60	80	60	1	0	0	0	0	0
154	1	41	6	0	1	0	-1	-1	0.5	0	20	60	40	60	0	0	0	0	0	0	0	0	0	0	0	0	0	0		0	1	0	0	0
155	1	12	2	0	2	-1	-1	-1	2	1	400	240	120	60	520	480	67	40	20	140	140	40	80	60	20	40	20	80	0	0	0	0	0	0
156	0	55	6	1	0	0	0.5	0.5	-1	-1	20	20	20	0	0	0	0	0	0	0	0	0							1	1		0	0
157	0	13	2	0	3	1	0	0	0.5	-1	1900	1580	1020	620	1820	1700	7	0	0	0	0	40							0	0		0	0
158	0	18	3	0	3	1	1	-1	2	3	680	560	280	220	380	240	3	0	0	20	0	0	0	0					1	1	1	0	0
159	1	26	4	0	3	2	1	1	2	1	3300	2120	2000	3220	300	200	7	0	0	20	0	20	0	20	0	20	0	0	1	0	0	0	0	0
160	0	37	5	1	2	0	0.5	0	0	1	120	20	0	0	0	0	0	0	0	0	0	0	0	0	0	0	0	0	1	0	1	0	0	0
161	0	19	3	0	1	-1	0	0	0	0	120	100	580	440	60	80	3	0	20	0	0	0	40	0	0	0	0	0	1	0	0	0	0	0
162	1	29	4	0	3	2	3	3	2	3	560	1140			960	1220	577	360	780	520	480	680	540	720	380	320	620	460	0	0	0	0	0	0
163	0	41	6	0	0	0	0	0	0	1	20	0	40	20	140	80	10	20	0	20	20	0	40	80	0	0	80	0	1	1	1	0	0	0
164	1	10	2	0	1	2	1	2	1	3	60	80	600	300	620	700	13	0	0	0	0	40	0	0	80	80	100	60		0	0	0	0	0
165	1	11	2	0	2	0.5	1	2	1	1	100	60	300	240	0	100	37	0	0	20	40	60	0	0	0	0	20	0	1	0	0	0	0	0
166	0	27	4	0	0	0	0	0	0	0	0	0	0	0	0	0	0	0	0	0	0	0	0	0	0	0	0	0	0	0	0	0	0	0
167	1	12	2	0	1	1	0	1	0	-1	0	0	0	0	4160	2320	0	0	0	0	0	0							0	0		0	0
168	0	29	4	0	1	0	0	0	1	0	100	60	100	140	280	200	3	0	0	0	0	0	0	0	0	20	0	0	0	0	0	0	0	0
169	0	7	1	1	3	1	0	-1	1	3	140	240	0	0	60	60	5	20	0			0	20	20	80	100	80	60	1	0	0	0	0	0
170	0	39	5	1	1	0	0	0	0.5	-1	20	0	0	0	0	0	0	0	0	0	0	0							1	0		0	0
171	1	9	1	1	3	2	0.5	-1	-1	-1	3580	3300	1700	920	2900	2940	5	0	20			0							0	0		0	0
172	0	35	5	1	2	0	0	0.5	0	0.5	40	0	80	80	0	40	0	0	0	0	0	0	0	0	0	0			1	0	1	0	0	0
173	0	13	2	0	3	0.5	1	1	-1	1	880	640	380	360	2280	2840	10	0	0	20	0	20	0	0	0	0	0	0	0	0	0	0	0	0
174	1	37	5	0	2	1	0	0	0	-1	460	560	440	700	240	300	0	0	0	0	0	0	0	0	0	0	0	0	1	0	0	0	0	0
175	1	35	5	0	3	2	0	-1	-1	1	1700	1720	820	600	4460	4400	0	0	0	0	0		20	40	0	0	0	0	0	0	0	0	0	0
176	1	16	3	0	3	-1	-1	-1	-1	3	5400	4640	2040	1880									3560	3100					1		0	0		0
177	0	37	5	1	0	0	0	0	0	0	20	0	0	0			0	0	0	0	0	0	0	0	0	0	0	0	1	1	1	0	0	0
178	0	37	5	1	0	0	0	0	0.5	-1	0	0	0	0	0	0	0	0	0	0	0	0							1	0		0	0
179	1	65	7	1	2	0	0	0	0	-1	140	60	0	0	40	20	0	0	0	0	0	0							0	0		0	0
180	0	14	2	1	3	1	2	2	2	2	280	340	160	340	160	160	37	40	0	40	60	60	60	80	0	60	0	40	0	0	0	0	0	0
181	0	28	4	1	1	0.5	1	0	0	1	40	60	40	60	40	80	0	0	0	0	0	0	0	0	0	0	0	0		0	1	0	0	0
182	1	14	2	1	3	-1	1	-1	0	3	1280	1120	240	320	1180	1440	3	0	0	0	20	0	1220	1580	1100	1480	1200	1240	0	0	0	0	0	0
183	0	9	1	0	2	0	0	0	1	-1	60	80	160	360	120	180	57	80	40	20	20	60							0	0		0	0
184	1	25	4	0	3	1	0.5	1	1	2	1060	760	740	340	740	780							1580	1480	640	720	1460	1460	0		0			0
185	0	19	3	1	0	0	0	0	1	1	0	0	0	0	0	0	0	0	0	0	0	0	0	0	0	0	0	0	0	0	0	0	0	0
186	0	26	4	0	1	0	0	-1	1	-1	80	60	40	80	0	0	0	0	0	0	0	0	0	0	0	0	0	0	1	0	0	0	0	0
187	1	13	2	1	3	2	2	-1	1	3	1760	1320	1220	200	460	460	0	0	0	0	0	0	480	600	240	240	240	260	0	0	0	0	0	0
188	1	8	1	1	1	2	1	2	2	2	140	180	740	680	240	420	0	0	0	0	0	0	240	240	140	140	220	240	0	0	0	0	0	0
189	0	29	4	1	0	-1	0	-1	0	-1	0	0	0	0	0	0	0	0	0	0	0	0							1	0		0	0
190	1	28	4	1	2	1	2	1	2	-1	280	260	720	920	2040	2020	3	0	20	0	0	0	540	700	640	660			0	0	0	0	0	0
191	1	9	1	0	1	0	0	1	1	2	160	120	280	120	340	500	57	60	60	40	120	0	20	60	20	80	20	40	0	0	0	0	0	0
192	0	41	6	0	2	0	0	1	0	-1	700	680	240	240	940	660	0	0	0	0	0	0							1	0		0	0
193	0	31	5	0	0.5	-1	0.5	0	1	1	0	0	0	0	0	0	0	0	0	0	0	0			340	300			0	0	0	0	0	0
194	1	47	6	1	1	0.5	2	-1	1	1	660	460	180	100	60	20	3	0	0	0	0	0	0	40	0	0	0	20	1	0	0	0	0	0
195	1	10	2	1	2	0.5	2	2	-1	2	40	80	140	60	40	120	60	0	40	0	0	140	100	80	60	80	60	60	0	0	0	0	0	0
196	1	7	1	1	1	1	0	0	0	-1	20	40	80	100	160	380	0	0	0	0	0	0							1	0		0	0
197	1	36	5	0	3	1	-1	-1	-1	-1	0	0	520	480	120	200													1			0
198	1	39	5	0	2	2	2	2	2	1	580	360	1100	1340	1020	680	140	200	280	120	180	40	160	300	100	160	200	320	0	0	0	0	0	0
199	1	36	5	0	1	0	1	0.5	0.5	1	20	20	100	20	40	60	0	0	0	0	0	0	0	0	0	0	0	0	1	0	0	0	0	0
200	0	26	4	1	0	0	0	0	0.5	1	0	0	0	0	0	0	0	0	0	0	0	0	0	0	0	0	0	0	1	1	1	0	0	0
201	1	9	1	1	2	1	2	1	3	2	40	80	20	0	0	0	20	0	40	20	0	20	80	60	40	80	60	80	0	0	0	0	0	0
202	1	7	1	0	1	-1	0	0	1	3	60	40	60	80	20	140	20	20	20	0	40	0	40	60	40	20	20	60	0	0	0	0	0	0
203	1	35	5	1	2	1	0.5	0	1	2	320	240	180	360	240	240	3	20	0	0	0	0	960	960	460	200	500	560	0	0	0	0	0	0
204	0	42	6	0	0	0	0	0	0	0	0	0	0	0	0	0	0	0	0	0	0	0	0	0	0	0	0	0	0	0	0	0	0	0
205	1	28	4	1	3	2	0	0	0	1	240	220	180	300	460	400	0	0	0	0	0	0	40	0	20	20	0	0	0	0	0	0	0	0
206	0	22	4	1	0	1	0	-1	0	-1	0	0	0	0	0	0	0	0	0	0	0	0	0	0	0	0	0	0	0	0	0	0	0	0
207	1	35	5	0	2	2	1	-1	-1	2	1900	1620			2200	1780	120	200	280	0	0		60	60	0	100	60	0	0	0	0	0	0	0
208	1	13	2	1	3	2	1	1	2	3	460	480	1300	1440	180	580	213	140	80	300	260	220	1120	1300	740	500	840	760	0	0	0	0	0	0
209	1	9	1	0	2	1	1	1	0.5	1	500	400	340	520	580	500	130	20	80			160	20	0	40	20	60	20	1	0	0		0	0
210	0	24	4	1	3	-1	0	-1	0	-1	0	20	80	140	340	540	0	0	0	0	0	0							0	0		0	0
211	1	38	5	1	2	0	0	0	0	3	860	700	300	260	240	120	0	0	0	0	0	0	800	820	840	780	800	700	0	0	0	0	0	0
212	0	42	6	0	0.5	0.5	1	0	0	0	0	0	0	0	20	40	0	0	0	0	0	0	0	0	0	0	0	0	1	0	0	0	0	0
213	0	10	2	1	3	1	2	1	1	3	60	20	380	380	540	540	10	40	0	20	0	0	480	560	220	340	500	200	0	0	0	0	0	0
214	0	26	4	0	3	1	0	1	0	0	700	800	180	220	1520	960	3	0	20	0	0	0	40	20	0	0	20	0	0	0	0	0	0	0
215	0	33	5	1	0	0	0	0	0	0	0	0	0	0	0	0	0	0	0	0	0	0	0	0	0	0	0	0	1	0	0	0	0	0
216	0	12	2	0	2	0	0	2	1	2	160	140	60	180	140	120	0	0	0	0	0	0	0	0	20	0	0	0	0	0	0	0	0	0
217	1	10	2	1	2	1	1	0	0	1	320	200	480	160	60	40	0	0	0	0	0	0	0	0	20	0	0	0	1	0	0	0	0	0
218	1	45	6	0	3	0	0	-1	0	-1	140	80	220	320	80	40	0	0	0	0	0	0	0	0	0	0	0	0	1	0	0	0	0	0
219	1	20	4	1	3	1	0	-1	-1	0	160	200	1560	1240	360	560	0	0	0	0	0	0	0	0	0	0	0	0	0	0	0	0	0	0
220	0	11	2	1	2	0.5	0.5	0	0	1	1500	760	460	1000	340	660	3	0	0	20	0	0	0	0	0	20	0	0	0	0	0	0	0	0
221	1	9	1	1	3	1	1	0	-1	1	700	600			1200	1220	0	0	0	0	0	0	20	0	0	0	0	0	0	0	0		0	0
222	1	38	5	0	2	0	0.5	-1	0	1	440	480	980	760	1740	1080	17	0	40	20	0	0	0	60	0	0	20	0	0	0	0	0	0	0
223	0	27	4	1	1	1	0	0	0	0	260	300	440	320	220	400	0	0	0	0	0	0	0	0	40	40	0	40	1	0	0	0	0	0
224	1	9	1	1	2	0	1	0	0	3	180	80	1620	1660	60	140	7	0	0	0	0	20	260	340	540	520	200	380	0	0	0	0	0	0
225	1	29	4	1	2	0	0	0	0	-1	220	140	440	300	240	220	0	0	0	0	0	0	20	0	60	60	40	20	1	0	1	0	0	0
226	1	50	6	1	1	0	0	0	0	2	300	300	120	40	320	200	0	0	0	0	0	0	620	300	760	620	220	320	1	0	0	0	0	0
227	1	20	4	0	2	1	-1	-1	-1	1	1580	1560	2240	1920	2280	2240							0	40	0	0	0	0	1		0	0		0
228	1	30	5	0	3	2	-1	-1	-1	-1	3380	2300	560	460	2020	2360													1			0
229	0	32	5	0	0	0	0	0	0	-1	0	0	0	0	0	0	843	2380	2660	0	0	20							0	0		0	0
230	0	32	5	1	2	0	0	-1	-1	1	140	60	360	180	500	440	0	0	0	0	0		0	0	0	0	0	0	0		0	0		0
231	1	7	1	1	2	2	0.5	2	1	1	100	320	440	280	360	380	0	0	0	0	0	0	100	40	120	40	60	80	1	0	0	0	0	0
232	1	16	3	0	3	3	-1	-1	-1	2	660	1280	3220	3440	3860	3180							20	0	0	20	0	0	0		0	0		0
233	0	26	4	1	2	1	0.5	-1	2	1	480	440	340	220	280	180	7	0	0	0	0	0	60	40	0	0	20	0	1	1	1	0	0	0
234	0	8	1	1	1	2	1	1	0	-1	180	120	440	220	80	40	3	0	20	0	0	0							0	0		0	0
235	0	22	4	1	2	0.5	1	1	0	-1	920	520	540	640	140	180	0	0	0	0	0	0							0	0		0	0
236	1	14	2	0	2	0.5	0	-1	0	-1							607	320	620	1420	1280	0								0			0
237	1	14	2	1	2	2	0	0	0	2	7420	4180	1800	2640	2400	1560	0	0	0	0	0	0	160	100					0	0	0	0	0	0
238	1	42	6	0	0	0	0	0	0	0	0	0	20	20			3	0	20	0	0	0	0	0	0	0	0	0	1	1	0	0	0	0
239	1	70	7	1	0	0	0	0	0	0	0	0	0	0	100	20	0	0	0	0	0	0	0	0	0	0	0	0	1	0	0	0	0	0
240	0	68	7	0	0	0	0	-1	0.5	0	0	0	0	0	20	0	0	0	0	0	0	0	20	0	0	0	0	0	1	0	0	0	0	0
241	0	17	3	1	3	1	1	0.5	0	0	100	100	0	0			0	0	0	0	0	0	0	0	0	0	0	0	0	0	0	0	0	0
242	0	15	3	0	3	1	2	0	1	3	120	80	120	140			17	0	20	20	40	0	0	0	40	0	0	0	0	0	0	0	0	0
243	0	11	2	1	2	0	1	0	1	0	40	40	200	300			0	0	0	0	0	0	40	20	0	0	20	0	0	0	0	0	0	0
244	0	38	5	1	0	0	0	0	0	0	0	0	0	0	0	40	0	0	0	0	0	0	0	0	0	20	0	0	0	0	0	0	0	0
245	1	12	2	0	1	1	2	0	2	2					0	60	30	0	60	0	80	0								0			0
246	1	10	2	0	1	0	1	0	0	-1	20	0	0	0	180	100	0	0	0	0	0	0							0	0		0	0
247	0	8	1	1	1	0	0	1	0	2	0	0	0	0	0	0	3	0	0	0	0	20	40	160	0	60	80	0	1	0	0	0	0	0
248	0	13	2	1	0.5	0	0	0	0	0	40	80	20	0	0	20	0	0	0	0	0	0	0	20	0	0	20	0	0	0	1	0	0	0
249	1	30	5	0	3	1	1	-1	0.5	1	2740	2800	540	520	1080	1220	10	0	0	20	40	0	0	0	0	0	0	0	1	0	0	0	0	0
250	0	30	5	1	1	1	0.5	-1	0	-1	80	100	140	100	80	120	0	0	0	0	0	0							0	0		0	0
251	0	9	1	0	2	0	0	1	2	0.5	220	260	340	360	300	220	40	60	40			20	0	0	0	0	0	0	0	0	0	0	0	0
252	0	30	5	1	0	0	0	0	0	-1	0	0	0	0	0	0	0	0	0	0	0	0							0	0		0	0
253	0	28	4	1	2	3	3	0.5	2	2	1240	1480	720	860	640	560	10	20	40	0	0	0	100	0	40	0	60	20	1	1	1	0	0	0
254	1	8	1	0	2	0	1	1	1	2	60	40	80	20	40	40	3	0	0	20	0	0	80	80	120	140	80	100	0	0	0	0	0	0
255	0	12	2	1	3	2	0	0	0	0	1820	1560	1560	1320	2180	1960	0	0	0	0	0	0	0	0	0	0	0	20	1	0	1	0	0	0
256	1	16	3	1	3	2	1	1	1	2	180	60	160	360	140	260	10	0	0	20	20		80	160	320	280	100	140	0	0	0	0	0	0
257	0	21	4	0	2	0.5	1	1	1	1	60	60	20	20	220	180	5	0	0	0	20		0	0	0	0	0	0	1	0	0	0	0	0
258	0	9	1	1	3	0	2	0.5	-1	2	180	160	580	400	1400	980	5			0	20	0	20	40	0	40	20	20	0	0	0	0	0	0
259	0	23	4	1	0	0	0	0	-1	0	0	0	0	0	0	0							0	0	0	0	0	0	1		0	0		0
260	0	21	4	0	0	0.5	0	1	-1	-1	0	0	0	0	0	0	0	0	0	0	0	0							0	0		0	0
261	0	35	5	0	2	0	0	1	1	1	340	340	160	320	740	860	0	0	0	0	0	0	20	20	0	0	0	0	0	0	0	0	0	0
262	1	30	5	0	3	1	-1	-1	0	-1	660	480	1300	860	1220	960	0	0	0	0	0	0							1	0		0	0
263	1	28	4	1	3	2	0.5	0.5	1	-1	720	700	400	320	1460	1440	0	0	0	0	0	0							0	0		0	0
264	0	60	7	0	1	1	0	0	1	0	0	0	0	0			0	0	0	0	0	0	0	0	0	0	0	0		0	1	0	0	0
265	1	13	2	1	3	3	1	0	0.5	-1	7800	5940	7000	6700	4080	3920	0	0	0	0	0								1	0		0	0
266	1	10	2	1	3	3	2	2	2	3	3600	3340	6560	7600	2900	2980	23	40	20	40	40	0	2740	2860	5060	5400	4940	5000	0	0	0	0	0	0
267	0	10	2	0	2	1	-1	-1	1	2	1060	660	1200	800	0	120	133	20	60	140	180	180	40	40	20	80	20	100	0	0	0	0	0	0
268	1	75	7	1	3	-1	1	0	0	1	1640	820	1520	920	1080	900	0	0	0	0	0	0	0	0	0	0	0	0	0	0	0	0	0	0
269	0	23	4	0	2	1	2	2	3	1	60	100	60	140	40	100	10	40	20	0	0	0	0	0	0	0	0	0	1	0	1	0	0	0
270	1	50	6	1	0	0	0	0	0	0	80	120	0	0	20	0	0	0	0	0	0	0	0	0	0	0	0	0	1	0	0	0	0	0
271	0	11	2	0	3	1	1	2	0.5	1	680	740	140	760	520	280	0	0	0	0	0	0	0	0	0	0	0	0	1	0	0	0	0	0
272	0	15	3	1	2	1	0.5	1	0.5	0	660	580	1880	1560	820	580	0	0	0	0	0	0	0	20	0	0	0	0	0	0	0	0	0	0
273	1	13	2	0	3	2	0.5	-1	0	-1	440	420	160	160	260	280	0	0	0	0	0	0							0	0		0	0
274	0	7	1	0	2	1	1	0.5	1	1	1040	540	280	500	620	480	3	0	0	0	0	20	60	20	0	0	0	0	0	0	0	0	0	0
275	1	60	7	0	2	0	0	0	-1	-1	60	120	140	40	200	160	5	0	0	0	20								0	0			0
276	1	13	2	0	3	-1	0	1	-1	-1	580	620	700	400	2780	2560													0			0
277	1	36	5	0	3	3	-1	-1	1	-1	7700	4440	6360	6740	7440	6480	7	0	0	0	0	0							1	0		0	0
278	0	25	4	1	1	0	0	0	0	-1	7940	8680	60	40	20	40	0	0	0	0	0	0							0	0		0	0
279	1	45	6	1	2	0.5	0	0	0	1	120	100	140	140	260	240	0	0	0	0	0	0	0	0	20	20	0	20	1	0	0	0	0	0
280	0	7	1	1	2	0	0	0	-1	-1	300	160	100	180	300	220													1			0
281	0	27	4	0	2	0	1	0	0.5	0	220	140	480	280	180	120	0	0	0	0	0	0	0	20	0	0	0	0	1	0	0	0	0	0
282	0	35	5	1	0.5	0	0	0	0	0	0	0	0	0	0	0	0	0	0	0	0	0	0	0					1	0	1	0	0	0
283	0	34	5	0	2	0	0	0	0	-1	120	160	200	100	340	280	0	0	0	0	0	0							1	0		0	0
284	0	19	3	0	2	-1	2	1	0	-1			1200	760	2520	2420	10	0	20	0	0	20							0	0		0	0
285	1	50	6	0	0.5	1	0	0	0.5	0	0	0	0	0	0	0	0	0	0	0	0	0	0	0	0	0			0	0	0	0	0	0
286	0	33	5	0	3	0	0	0	0	-1	20	20	200	160	40	80	0	0	0	0	0	0								0		0	0
287	0	29	4	1	0	0	0	-1	0	-1	520	280	0	0	100	200	0	0	0	0	0	0							1	0		0	0
288	1	26	4	1	3	3	3	1	-1	3	6740	6520			2520	2220	0	0	0	0	0	0	120	80	40	60			0	0	1		0	0
289	0	20	4	0	0	0.5	0	0	0	0	0	0	0	0	0	0	0	0	0	0	0		0	0	0	0	0	0	1	0	1	0	0	0
290	0	9	1	1	1	0	0	0	0	0	20	40	40	40	0	0	0	0	0		0		0	0					1	0	1	0	0	0
291	0	25	4	0	2	1	2	-1	2	2	1000	700	380	160	220	200	117	140	60	100	60	160	40	40	200	40	0	20	1	1	0	0	0	0
292	0	13	2	0	0	0	0	0	0	-1	0	0	0	20	0	0	0	0	0	0	0	0							0	0		1	0
293	0	21	4	0	0	0	0	-1	0	-1	0	0	0	0	0	0	0	0	0	0	0	0							0	0		0	0
294	1	9	1	1	3	0	1	2	1	1	480	640	900	1000	420	420	7	0	0	40	0	0	60	120	40	40	40	100	0	0	0	0	0	0
295	1	62	7	1	1	0	0	0	0	0	160	180	100	120	20	20	0	0	0	0	0	0	0	0	0	0	0	0	1	0	1	0	0	0
296	0	17	3	1	3	2	2	0	2	1	320	240	680	420	1640	1480	0	0	0	0	0	0	0	0	0	0	0	0	0	0	0	0	0	0
297	0	16	3	0	3	1	1	0.5	1	-1	80	40	20	20	0	0	0	0	0	0	0	0							0	0		0	0
298	1	10	2	1	2	1	2	2	3	3	20	20	260	300	20	20	70	40	100	100	60	60	100	140	360	540	60	320	0	0	0	0	0	0
299	0	32	5	0	2	0	0	-1	-1	1	60	40	240	220	0	60	3	0	0	0	20	0							0	0		0	0
300	1	20	4	0	3	3	1	-1	-1	3	6680	5660	2280	1840			0	0	0	0	0	0	260	340	100	160	440	380	0	0	0	0	0	0
301	1	25	4	0	3	0.5	0	-1	0	0	300	260	360	460	600	620	0	0	0	0	0	0	60	60	0	0	0	0	0	0	0	0	0	0
302	0	22	4	0	2	-1	0	0	0	0	520	520	220	280	220	340	0	0	0	0	0	0	0	0	0	0	0	0	1	0	0	0	0	0
303	1	36	5	1	3	2	0	-1	0	0	600	440	460	520	860	700	0	0	0	0	0	0	0	0	0	0	0	0	0	0	0	0	0	0
304	1	32	5	1	2	1	1	-1	1	1	40	40	60	100			0	0		0	0	0	0	0	0	0	0	0	0	0	0	0	0	0
305	0	39	5	1	0	0	0	0	0	-1	0	0	0	0	0	0	0	0	0	0	0	0							0	0		0	0
306	0	7	1	1	0	0	0.5	0	0	-1	40	0	20	20	40	0	3	0	20	0	0	0							0	0		0	0
307	1	14	2	0	3	1	0	0	0	-1	700	880	340	260	1280	900	57	0	80	60	120	40							0	0		0	0
308	1	12	2	1	2	-1	2	2	0	-1	1960	640	60	20	180	100	80	0	40	80	40	140							0	0		0	0
309	0	22	4	1	3	-1	1	-1	0.5	0	860	380	700	560	100	120	7	0	0	20	0	20	100	60	20	60	0	0	1	0	1	0	0	0
310	1	21	4	1	2	2	1	0.5	0	1	3920	3620	240	260	540	820	0	0	0	0	0	0	0	0					1	0	0	0	0	0
311	1	23	4	1	3	3	0	-1	0	3	740	1500	2140	2120	4160	4420	3	0	20	0	0	0	1740	2080	1840	2220			0	0	0	0	0	1
312	0	68	7	1	2	0.5	-1	0	0.5	1	280	280	140	280	180	220	3	0	0	0	0	20	0	20	0	0	0	0	1	0	1	0	0	0
313	0	14	2	1	3	1	2	1	1	2	1260	1080	1140	460	180	60	0	0	0	0	0	0	140	80	60	0	60	20	1	0	0	0	0	0
314	1	26	4	0	3	2	0	-1	1	2	320	260	1060	1160	1180	960	0	0	0	0	0	0	0	0	20	0	0	0	1	0	1	0	0	0
315	1	21	4	1	1	-1	0	2	0.5	0	0	0	0	20	0	0	0	0	0	0	0	0	0	0	0	0	0	0	0	0	0	0	0	0
316	1	28	4	0	3	1	0.5	2	1	2	1900	1960	4140	4040	7440	7020	0	0	0	0	0	0	20	0	0	0	0	0	1	0	0	0	0	0
317	1	30	5	0	3	1	1	2	2	3	760	140	560	860			0	0	0	0	0		20	0	20	0	0	20	1	0	0	0	0	0
318	0	39	5	0	2	0.5	0	0	1	0	480	280	220	180	20	40	3	20	0	0	0	0	140	80	0	20	0	0	1	0	0	0	0	0
319	0	10	2	0	3	2	2	2	1	1	440	380	180	100	320	60	103	120	140	200	120	20	140	40	40	80	180	120	0	0	0	0	0	0
320	1	17	3	0	2	0	0.5	1	0	-1	140	40	380	460	320	460	17	0	20	40	0	0							0	0		0	0
321	0	24	4	1	3	2	2	-1	2	3	1740	1020	1380	1840	840	1700	20	0	0	0	0	100	400	280	380	300			1	1	1	0	0	0
322	0	29	4	0	2	-1	2	-1	1	2	880	800	460	400	580	540	250	500	300	140	60		220	180	40	80	40	40	1	0	1	0	0	0
323	0	9	1	0	2	0	-1	1	-1	3	0	0	0	0	0	0							180	60	0	20	160	140	1		1	0		0
324	1	29	4	0	3	-1	0.5	1	2	2	560	700	420	580	500	760	3	0	20	0	0	0	0	0	0	0	0	0	0	0	0	0	0	0
325	0	23	4	1	2	1	0	0.5	2	1	20	20	40	0	20	0	0	0	0	0	0	0	0	0	0	0	0	0	0	0	0		0	0
326	1	18	3	1	3	0	0.5	0.5	0.5	1	1280	1120	200	400	300	300	0	0	0	0	0	0	40	40	40	80	20	20	0	0	0	0	0	0
327	0	17	3	1	3	1	1	1	1	1	1080	820	1040	1300	1440	1580	0	0	0	0	0	0	0	0	0	0	0	0	0	0	0	0	0	0
328	1	33	5	1	3	2	1	0.5	1	1	400	1100	3400	2640	2600	3000	0	0	0	0	0	0	20	0	0	0	0	0	0	0	0	0	0	0
329	1	11	2	0	3	2	0	1	2	2	860	860	3160	2760	300	360	10	0	0	40	20	0	40	0	100	80	200	200	0	0	0	0	0	0
330	1	9	1	1	3	1	0.5	-1	1	2	40	100	380	380	20	0	3	0	20	0	0	0	140	140	240	280	0	40	0	0	0	0	0	0
331	1	29	4	1	3	2	0	0	0	-1	620	420	1460	1880	420	480	0	0	0	0	0	0							1	0		0	0
332	1	27	4	0	2	0	0.5	-1	-1	1	160	140	20	220	120	220	0	0	0	0	0		0	0	60	0	0	0	1	0	1		0	0
333	0	23	4	1	0	0	0	-1	0.5	0.5	0	0	0	0	0	0	0	0	0	0	0	0	0	0	0	0	0	0	1	0	0		0	0
334	1	29	4	0	3	2	1	2	1	2		1240	1000	1100			0	0	0	0	0	0	20	0	0	0	20	0	1	0	0	0	0	0
335	1	25	4	0	2	0	-1	-1	1	2	120	20	320	560	40	120	3	20	0	0	0	0	80	20	60	40	0	40	1	0	0	0	0	0
336	0	35	5	1	2	0	0	-1	0	-1	720	400	220	260	180	200	0	0	0	0	0	0							1	0		0	0
337	1	8	1	0	3	2	2	3	2	3	1540	1640	220	280	440	500	70	20	0	20	20	240	360	320	160	220	340	300	0	0	0	0	0	0
338	0	24	4	0	2	1	0	0	0	1	280	280	400	360			0	0	0	0	0	0	0	0	0	0	0	0	1	0	0	0	0	0
339	1	10	2	1	2	2	1	-1	1	3	3300	3420	820	580	2940	1980	3	0	0	20	0	0	240	240	680	720	420	380	0	0	1	0	0	0
340	0	63	7	1	0.5	-1	0	0	0	0	0	0	0	0	0	0	0	0	0	0	0	0	0	0	0	0	0	0	1	0	1	0	0	0
341	1	19	3	0	3	2	-1	1	1	-1	1600	2220	1980	3460	2760	1760	20	0	0			60							1	0		0	0
342	1	30	5	1	3	-1	2	1	1	2	1960	1900	700	680	160	220	0			0	0	0	20	0	0	0	0	0	1	0	0	0	0	0
343	1	36	5	1	3	1	2	1	0	1	3560	4260	4020	3420	4500	3160							0	0	0	0	80	0	1		0	0		0
344	0	14	2	0	2	1	0	0	0	1	240	380	920	640	600	720	0	0	0	0	0	0	0	0	0	0	0	20	1	0	1	0	0	0
345	1	7	1	0	2	2	1	2	1	2	20	80	220	120	60	120	0	0	0	0	0	0	20	60	40	20	0	20	0	0	0	0	0	0
346	1	19	3	0	3	2	1	1	1	-1	2000	2760	3040	3540	1420	1580	27	0	0	0	60	60							1	0		0	0
347	0	25	4	0	3	2	0	0.5	0	1	700	360	760	560	1040	840	0	0	0	0	0	0	0	40	40	0			0	0	1	0	0	0
348	1	8	1	1	2	-1	1	1	2	-1	600	460	1900	1700	920	1140	7	0	0	20	0	20							0	0		0	0
349	0	35	5	0	2	-1	2	-1	2	3	860	1000	3160	2880	2700	3980	13	0	0	0	0	40	40	0	60	80	0	0	0	0	1	0	0	0
350	1	23	4	0	3	2	0	-1	0	2	2400	1900	3000	3000	3400	3600	0	0	0	0	0	0	20	0	0	20			1	0	0	0	0	0
351	0	16	3	1	2	3	0	1	0.5	1	700	480	420	580	500	500	23	20	40	60	20	0	100	100	140	120	20	0	0	0	0	0	0	0
352	1	47	6	0	3	1	0.5	0	0	-1	0	0	900	360	140	100	10	40	20	0	0	0							1	0		0	0
353	0	48	6	0	3	0	0	-1	1	0.5	20	20	40	40	0	40	0	0	0	0	0	0	0	0	0	0	0	0	0	0	1	0	0	0
354	1	12	2	0	3	0	0	-1	0	2	3220	2560	0	0	3120	3360	0	0	0	0	0	0							1	0		0	0
355	0	25	4	0	0	0.5	1	-1	-1	-1	20	40	2340	2160	5120	4440	30	40	20	40	20		20	40	0	40	20	0		0	0	0	0	0
356	0	65	7	0	2	0.5	1	1	1	1	0	20	0	0	100	200	33	0	60	0	0	60	0	0	20	0	0	0	1	0	1	0	0	0
357	0	64	7	0	0	0	1	0	0	0	520	300			680	560	40	0	0	0	0	80	0	0	0	0	0	0	0	1	0		0	0
358	0	53	6	1	1	0	0.5	-1	0.5	1	0	20	0	0	20	0	0	0	0	0	0	0	0	0	0	20	0	0	1	1	1	0	0	0
359	0	45	6	0	1	0	0	0	0	1	40	100	80	40	20	20	0	0	0	0	0	0	0	0	0	0	0	0	1	1	1	0	0	0
360	0	25	4	0	3	-1	2	-1	1	1	280	460	560	980	680	500	10	0	0	0	0	20	20	20	20	0	40	100	0	0	1	0	0	0
361	0	13	2	0	3	2	3	-1	3	3	540	760	2780	2300	2880	2800	315	260	80			580	340	220	140	120	340	240	0	0	0	0	0	0
362	1	9	1	1	3	2	1	-1	0	3	380	400			700	620	0	0	0	0	0	0	40	60	340	240			0	0	0		0	0
363	0	37	5	0	2	1	1	0	0	-1	180	280	420	320			0	0	0	0	0	0							0	0		0	0
364	1	23	4	1	3	0.5	1	-1	-1	0.5	380	520	760	900	1880	2160	3	0	20	0	0	0	20	0	0	40	0	0	0	0	0	0	0	0
365	0	13	2	1	3	1	0	0.5	0	-1	1360	880	1120	1340	560	380	0	0	0	0	0	0							0	0		0	0
366	1	42	6	0	0	0	0.5	0	0	0	0	60	20	40	0	0	0	0	0	0	0	0	0	0	20	0	0	0	0	0	0	0	0	0
367	0	35	5	1	1	-1	0	1	1	-1	20	0	60	120	0	20	0	0	0	0	0	0							0	0			0
368	0	38	5	1	1	0	1	-1	0	3	320	420	1000	1100	520	1120	0	0	0	0	0	0	200	340					1	0	0	0	0	0
369	0	23	4	0	2	2	0.5	-1	2	-1	960	1160	2360	2600	1460	1120	0	0	0	0	0	0							0	0		0	0
370	1	43	6	0	3	1	-1	-1	0.5	2	400	360	580	440			0	0	0	0	0	0	0	0	0	0	40	20	1	0	1	0	0	0
371	0	43	6	1	0	1	0.5	-1	0	1	100	220	240	120	20	100	3	0	0	20	0	0	0	0	0	0			1	0	0	0	0	0
372	1	16	3	1	2	2	2	1	2	3	960	1080	580	560	2540	2020	3	0	0	0	20	0	60	160	40	80	100	120	0	0	0	0	0	0
373	1	7	1	1	1	-1	1	-1	1	2	1460	1480	1460	1180	880	900	3	0	0	0	20	0	120	0					0	0	0	0	0	0
374	0	14	2	1	2	2	0	-1	0	-1	500	480	980	760	280	180	0	0	0	0	0	0							0	0		0	0
375	0	59	6	0	0	-1	0	-1	0	0	0	0	20	0	0	0	3	0	0	0	0	0	0	0	0	0	0	0	1	0	0	0	0	0
376	0	57	6	0	2	0.5	1	1	1	1	140	40	20	0	120	240	0	0	0	0	0	0	0	0	0	0	0	0	1	0	1	0	0	0
377	0	13	2	0	3	3	1	0	1	-1	3660	2760	1500	1440	2420	1700	20	80	20	0	20	0	120	60	100	0	60	20	0	0	0	0	0	0
378	1	30	5	0	3	-1	1	1	0.5	3	0	0	0	0	20	20	13	20	40	20	0	0	600	580	560	660	520	600	0	0	0	0	0	0
379	1	9	1	1	3	3	3	2	2	3	1320	1860	3760	3180	1240	2200	0	0	0	0	0	0	100	40	200	160	200	200	0	1	1	0	0	0
380	1	48	6	0	0	0.5	0.5	0	-1	0.5	60	40	0	0	20	60	0	0	0	0	0	0	0	0	0	0	0	0	1	0	0	0	0	0
381	1	13	2	0	3	3	3	3	3	3	2320	2120	3400	2600	1940	1720	343	660	120	60	100	440	0	0	20	0	460	280	0	0	1	0	0	0
382	0	23	4	1	1	0	0	0.5	0	0	0	0	0	0	0	0	0	0	0	0	0	0	0	0	0	0	0	0	1	0	0	0	0	0
383	1	36	5	0	3	1	2	2	1	1	200	300	1460	1780	480	760	7	0	20	0	20	0	20	0	120	0	100	180	0	0	0	0	0	0
384	0	36	5	0	0	-1	-1	-1	0	-1	0	0	0	0	0	0	0	0	0	0	0	0							1	0		0	0
385	0	9	1	0	0	-1	-1	-1	-1	-1	0	0	0	0	0	0	0	0	0	0	0	0							1	0		0	0
386	0	7	1	1	1	1	0.5	-1	1	-1	240	60	40	20	140	60	0	0	0	0	0	0							1	0		0	0
387	1	13	2	0	3	3	3	-1	3	3	9340	9820	720	920	1880	2080	1827	1580	1340	960	1280	3080	320	320	520	360	420	340	0	0	0	0	0	0
388	1	30	5	1	1	0	1	-1	0	1	40	20	40	40	0	60	0	0	0	0	0	0	0	0	20	40	20	0	0	0	0	0	0	0
389	0	12	2	0	2	-1	0.5	-1	1	-1	0	0	160	0	40	0	3	0	0	20	0	0							1	0		0	0
390	1	26	4	1	3	2	0	0	0	-1	1160	1480	1200	1540	1720	1780	0	0	0	0	0	0	0	40					1	0	0	0	0	0
391	1	23	4	1	3	3	2	0.5	1	2	740	1140	760	1000	880	1020							20	40	60	0	0	0	0		0	0		0
392	0	17	3	0	0	1	1	1	0	1	0	0	0	0	0	0	0	0	0	0	0	0	0	0	0	0	0	0	1	1	0	0	0	0
393	1	48	6	1	0.5	0	0.5	0	0	0	40	40	40	60	0	0	0	0	0	0	0	0	0	0	0	0	0	0	1	0	0	0	0	0
394	1	68	7	1	2	0.5	0.5	0	0	0	40	0	340	220	100	120	0	0	0	0	0	0	20	20	0	0	0	0	1	0	0	0	0	0
395	0	39	5	1	3	1	2	1	0	2	1500	1980	660	500			0	0	0	0	0	0	0	0	0	0	20	0	1	0	0	0	0	0
396	1	20	4	0	3	2	1	0	0	0	520	760	300	240	780	720	0	0	0	0	0	0	0	40	60	0	0	0	0	0	0	0	0	0
397	1	19	3	0	3	1	0.5	0	0	1	260	180	1360	1040	80	120	0	0	0	0	0	0	20	0	0	0	20	0	1	0	0	0	0	0
398	0	17	3	1	3	1	0	0	0	0	900	920	400	500	1300	1040	0			0	0	0	0	0	0	0	0	0	1	0	1	0	0	0
399	1	18	3	1	3	2	0.5	1	2	2	740	840	1460	1020	340	180	0	0	0	0	0	0	120	40	280	280	260	360	0	0	0	0	0	0
400	1	13	2	0	3	0	1	0.5	0	3	2600	3440	3860	2240	1680	1440	0			0	0	0	1040	760	200	200	580	880	1	0	0	0	0	0
401	1	10	2	1	3	2	0	0	0	2	820	1180	2760	1740	1680	1260	0	0	0	0	0	0	580	440	400	500	200	260	0	0	0	0	0	0
402	0	7	1	1	2	0	1	0.5	-1	2	40	100	60	160	20	0	0	0	0	0	0	0	20	60	20	0	20	0	0	0	0	0	0	0
403	1	28	4	0	3	1	-1	-1	0	-1	2680	2100	3120	3420	3420	2240	0	0	0	0	0	0							0	0		0	0
404	0	51	6	1	1	0	0.5	0.5	0	0	0	0	0	0	0	0	0	0	0	0	0	0	0	0	0	0	0	0	1	0	1	0	0	0
405	1	36	5	0	2	0	0	-1	0	-1			80	120	40	100	0	0	0	0	0	0	20	0	0	0	0	20	1	0	0	0	0	0
406	1	13	2	1	3	2	2	-1	2	3	140	140	360	520	120	100	70	40	40	0	0	160	200	220	240	180	180	200	1	0	0	0	0	0
407	0	50	6	0	0	0	-1	-1	0	0	0	0	0	0	0	0	0	0	0	0	0	0	0	0	0	0	0	0	1	0	0	0	0	0
408	1	7	1	1	1	-1	2	0	0	-1	660	840	0	0	0	80	3	0	0	0	20	0							0	0		0	0
409	1	18	3	1	2	1	2	-1	-1	2	600	900	60	60	580	400	65	140	100	0	20		0	0	100	40	20	60	0	0	0	0	0	0
410	1	14	2	0	2	1	0	1	0.5	2	2000	900	100	260	940	1840	0	0	0	0	0	0	40	0	20	60	20	20	1	0	0	0	0	0
411	1	12	2	0	3	2	0	2	3	2	1380	1280	40	0	1820	1920	53	120	60	80	60	0	160	120	20	0	180	160	0	0	0	0	0	0
412	0	15	3	0	3	0.5	0	-1	0.5	-1	40	140	300	220	140	300	0	0	0	0	0	0							0	0		0	0
413	0	9	1	1	1	0	0	0	0	1	80	60	120	80	320	120	0	0	0	0	0	0	20	20	0	40	0	0	0	0	0	0	0	0
414	0	28	4	1	0	0	0	0.5	0	0.5	0	0	0	0	0	0	0	0	0	0	0	0	0	0	0	0	0	0	0	0	0	0	0	0
415	0	64	7	0	0	0.5	0	-1	-1	-1	0	0	0	0	0	0	0	0	0	0	0	0							0	0		0	0
416	1	37	5	1	2	0	2	1	2	-1	0	0	20	40	20	0	0	0	0	0	0	0							0	0		0	0
417	0	9	1	0	1	0	0	1	0	1	0	20	0	0	0	0	0	0	0	0	0	0	0	40	0	20	20	0	0	0	0	0	0	0
418	0	39	5	1	1	0	1	0	1	-1	20	0	0	0			10	0	0	0	20	20							0	0		0	0
419	1	16	3	1	3	1	1	0.5	-1	2	940	740	2440	2360	740	1000							40	60	20	60	60	80	1		0	0		0
421	0	7	1	0	1	1	3	1	3	-1	100	120	0	0	960	880	97	0	0	220	240	60	620	620	740	700	660	520	0	0	0	0	0	0
422	0	9	1	1	2	1	1	1	0.5	2	300	220	360	340	200	180	0	0	0	0	0	0							0	0		0	0
423	0	23	4	0	2	1	2	-1	2	1	880	580	100	80	1300	1100	30	20	0	120	40	0	2060	1840	2360	1860	2220	1940	1	0	0	0	0	0
424	0	38	5	0	0	0	0	0	0	0	80	140	40	20	20	0	0	0	0	0	0	0	0	0	0	0	0	0	1	1	1	0	0	0
425	1	15	3	0	0	0.5	1	1	2	-1	40	0	0	0	0	0	0	0	0	0	0	0							0	0		0	0
426	0	29	4	1	2	0	1	0.5	0	0	0	20	260	200	340	280	0	0	0	0	0	0	0	0					1	0	0	0	0	0
427	1	12	2	0	2	1	-1	0.5	0	2	0	40	120	240	200	120	3	0	0	0	0	20	100	100	0	0	20	20	0	0	0	0	0	0
428	1	57	6	1	0	-1	0.5	0.5	0	0	0	0	0	0	0	0	0	0	0	0	0		0	0	0	0	0	0	0	0	0	0	0	0
429	0	38	5	0	0	0	-1	-1	0.5	1	0	0	40	80	80	100	0	0	0	0	0	0	0	0	0	20	0	0	1	0	0	0	0	0
430	1	13	2	0	2	1	1	0.5	1	2	40	0	260	80	140	220	0	0	0	0	0	0	0	0	0	0	0	0	0	0	0	0	0	0
431	0	11	2	0	0	0	-1	-1	1	1	20	0	0	40	0	0	0	0	0	0	0	0	0	0	0	20	0	0	1	0	0	0	0	0
432	0	10	2	0	0.5	0	-1	-1	1	1	40	60	60	0	40	40	7	0	0	0	0	40	60	20	0	0	40	20	1	0	0	0	0	0
433	0	30	5	1	0	0.5	1	0	0	0	0	0	0	0	80	80	0	0	0	0	0	0	0	260	0	0	0	0	1	0	1	0	0	0
434	1	29	4	0	3	2	1	1	1	1	2180	2840	1480	1040	2060	2260	10	0	0	0	0	40	0	20	80	20	60	60	1	0	0	0	0	0
435	0	38	5	0	1	0.5	-1	-1	1	0.5	0	0	40	40	0	0	0	0	0	0	0		0	0	0	0	0	0	1	0	0	0	0	0
436	0	16	3	1	2	-1	0.5	0	0	1	80	100	100	140	260	500							0	0	260	380			0		0	0		0
437	1	11	2	0	0.5	0	-1	-1	2	-1	380	180	200	460	880	980	10	0	0	40	0		0	0	20	20	0	20	1	0	0	0	0	0
438	1	18	3	1	2	-1	2	-1	1	2	80	40	460	600	900	960	20	20	60	0	0		0	0	0	0			1	0	0	0	0	0
439	1	30	5	1	3	2	1	-1	0	0.5	1680	1140	1860	1940	2140	1660	0	0	0	0	0	0	0	0	0	0	0	0	1	0	0	0	0	0
440	1	31	5	0	0	-1	0	0	0	-1	320	220	160	120	340	180	0	0	0	0	0	0	0	0	0	0	0	0	0	0	0	0	0	0
441	1	10	2	0	0	0	0	-1	0	1	0	0	60	40	20	60	0	0	0	0	0	0	0	20	20	20	20	0	0	0	0	0	0	0
442	0	7	1	1	0.5	0.5	0	-1	0	0.5	0	0	20	0	0	0	0	0	0	0	0	0	0	0	0	0	0	0	0	0	0	0	0	0
443	0	10	2	1	3	0	0	-1	0	2	80	160	0	20	60	20	0	0	0	0	0	0	0	60	100	40	80	120	0	0	0	0	0	0
444	0	45	6	0	1	0	1	1	1	2	100	20	20	40	100	160	7	0	20	0	20	0	60	20	0	0	40	60	0	0	0	0	0	0
445	0	41	6	1	1	1	0.5	0.5	0	-1	0	0	0	0	0	0	0	0	0	0	0	0							0	0		0	0
446	0	18	3	1	1	0	0	0	-1	0	0	60	20	0	20	60	0	0	0	0	0	0	0	0	20	0	20	0	0	0	0	0	0	0
447	1	8	1	0	0	1	1	1	0	0	40	60	20	20	0	20	0	0	0	0	0	0	0	0	0	0	0	0	1	0	0	0	0	0

## Sheet: Notes
Notes
	"-1" or blank = missing
	Sm = Schistosoma mansoni
	Hkw = hookworm species
	Al = Ascaris lumbricoides
Anonymised ID
Gender		0 = female; 1 = male
Age
Age Groupings		1 = "7-9"; 2 = "10-14"; 3 = "15-19"; 4 = "20-29"; 5 = "30-39"; 6 = "40-59"; 7 = ">=60"
Tx		treatment regimen 0 = 1 treatment; 1 = 2 treatments
CCA (letter)
	A	baseline
	B	baseline + 24 hours
	C	two weeks
	D	two weeks + 24hours
	E	nine weeks
	G	two years
Sm (letter) (Kato-Katz number.slide number)
	A	baseline
	E	nine weeks
	G	two years
Hkw (letter)
	A	baseline
	E	nine weeks
	G	two years
Al (letter)
	A	baseline
	E	nine weeks
	G	two years
